# Supplementary material for: Alternative lengthening of telomeres is mechanistically linked to potential therapeutic vulnerability in the stem‐like subtype of gastric cancer
Source: PubMed Central journal article supplement (PMC8438564; doi:10.1002/ctm2.561), 2021-09-14
Supplement: CTM2-11-e561-s001.pdf [file CTM2-11-e561-s001.pdf]

**Table S4.** List of significant gene ontology (GO) terms enriched in HDAC8 targeted genes

| TFs   | Category                | Term          | Description                                                                                  | LogP         | Log(q-value) |
|-------|-------------------------|---------------|----------------------------------------------------------------------------------------------|--------------|--------------|
| HDAC8 | Canonical Pathways      | M8            | PID ENDOTHELIN PATHWAY                                                                       | -5.510813012 | -1.421305    |
| HDAC8 | Reactome Gene Sets      | R-HSA-9029558 | NR1H2 & NR1H3 regulate gene expression linked to lipogenesis                                 | -5.439381108 | -1.421305    |
| HDAC8 | GO Biological Processes | GO:0031663    | lipopolysaccharide-mediated signaling pathway                                                | -4.226300029 | -0.7747167   |
| HDAC8 | Canonical Pathways      | M11           | PID PRL SIGNALING EVENTS PATHWAY                                                             | -4.131156321 | -0.7662928   |
| HDAC8 | GO Biological Processes | GO:0060761    | negative regulation of response to cytokine stimulus                                         | -3.731195947 | -0.7172954   |
| HDAC8 | KEGG Pathway            | hsa04932      | Non-alcoholic fatty liver disease (NAFLD)                                                    | -3.704790945 | -0.7172954   |
| HDAC8 | KEGG Pathway            | hsa04540      | Gap junction                                                                                 | -3.550899947 | -0.6982558   |
| HDAC8 | Reactome Gene Sets      | R-HSA-109582  | Hemostasis                                                                                   | -3.421095587 | -0.6756161   |
| HDAC8 | GO Biological Processes | GO:0010821    | regulation of mitochondrion organization                                                     | -3.220152609 | -0.5542591   |
| HDAC8 | GO Biological Processes | GO:0051817    | modification of morphology or physiology of other organism involved in symbiotic interaction | -3.082662355 | -0.4886903   |
| HDAC8 | Canonical Pathways      | M220          | PID CASPASE PATHWAY                                                                          | -3.067433627 | -0.4886903   |
| HDAC8 | Reactome Gene Sets      | R-HSA-429914  | Deadenylation-dependent mRNA decay                                                           | -2.996293999 | -0.4553392   |
| HDAC8 | GO Biological Processes | GO:0010256    | endomembrane system organization                                                             | -2.92931162  | -0.416257    |
| HDAC8 | GO Biological Processes | GO:0048598    | embryonic morphogenesis                                                                      | -2.863795513 | -0.3771984   |
| HDAC8 | GO Biological Processes | GO:0042692    | muscle cell differentiation                                                                  | -2.572009426 | -0.3136012   |
| HDAC8 | GO Biological Processes | GO:0008015    | blood circulation                                                                            | -2.476648228 | -0.2613459   |
| HDAC8 | GO Biological Processes | GO:1902532    | negative regulation of intracellular signal transduction                                     | -2.361991273 | -0.2258524   |
| HDAC8 | GO Biological Processes | GO:0071897    | DNA biosynthetic process                                                                     | -2.231394021 | -0.1864458   |
| HDAC8 | GO Biological Processes | GO:0071156    | regulation of cell cycle arrest                                                              | -2.186503394 | -0.1629787   |
| HDAC8 | GO Biological Processes | GO:0051648    | vesicle localization                                                                         | -2.174588724 | -0.1629787   |
