# Supplementary material for: Alternative lengthening of telomeres is mechanistically linked to potential therapeutic vulnerability in the stem‐like subtype of gastric cancer
Source: PubMed Central journal article supplement (PMC8438564; doi:10.1002/ctm2.561), 2021-09-14
Supplement: CTM2-11-e561-s002.pdf [file CTM2-11-e561-s002.pdf]

**Table S2.** List of significant signature genes involved in the telomere maintenance mechanism across cancer types

| Chromatin Decompaction Type | TMM type                         | Gene name      | P-value    |
|-----------------------------|----------------------------------|----------------|------------|
| High                        | Alternative Lengthening Telomere | <i>AKTIP</i>   | 0.075      |
| High                        | Alternative Lengthening Telomere | <i>ATRX</i>    | 0.01241    |
| High                        | Alternative Lengthening Telomere | <i>BLM</i>     | 2.751E-15  |
| High                        | Alternative Lengthening Telomere | <i>BRCA1</i>   | 0.4623     |
| High                        | Alternative Lengthening Telomere | <i>BRCA2</i>   | 5.497E-10  |
| High                        | Alternative Lengthening Telomere | <i>CHEK1</i>   | 2.2E-16    |
| High                        | Alternative Lengthening Telomere | <i>DAXX</i>    | 0.003197   |
| High                        | Alternative Lengthening Telomere | <i>FANCD2</i>  | 2.2E-16    |
| High                        | Alternative Lengthening Telomere | <i>FEN1</i>    | 2.2E-16    |
| High                        | Alternative Lengthening Telomere | <i>HDAC1</i>   | 1.294E-13  |
| High                        | Alternative Lengthening Telomere | <i>HDAC2</i>   | 0.01494    |
| High                        | Alternative Lengthening Telomere | <i>HDAC9</i>   | 0.4194     |
| High                        | Alternative Lengthening Telomere | <i>HNRNPA1</i> | 2.2E-16    |
| High                        | Alternative Lengthening Telomere | <i>MND1</i>    | 2.2E-16    |
| High                        | Alternative Lengthening Telomere | <i>MRE11A</i>  | 0.00000075 |
| High                        | Alternative Lengthening Telomere | <i>MUS81</i>   | 0.05608    |
| High                        | Alternative Lengthening Telomere | <i>NBN</i>     | 7.098E-10  |
| High                        | Alternative Lengthening Telomere | <i>NR2C2</i>   | 1.71E-13   |
| High                        | Alternative Lengthening Telomere | <i>NR2F2</i>   | 2.2E-16    |
| High                        | Alternative Lengthening Telomere | <i>NSMCE2</i>  | 5.935E-08  |
| High                        | Alternative Lengthening Telomere | <i>PCNA</i>    | 2.2E-16    |
| High                        | Alternative Lengthening Telomere | <i>PML</i>     | 0.00002989 |
| High                        | Alternative Lengthening Telomere | <i>POLD1</i>   | 9.421E-12  |
| High                        | Alternative Lengthening Telomere | <i>POLD3</i>   | 2.776E-06  |
| High                        | Alternative Lengthening Telomere | <i>POLD4</i>   | 0.2556     |
| High                        | Alternative Lengthening Telomere | <i>RAD51</i>   | 2.2E-16    |

|      |                                  |                 |           |
|------|----------------------------------|-----------------|-----------|
| High | Alternative Lengthening Telomere | <i>RFC1</i>     | 0.07714   |
| High | Alternative Lengthening Telomere | <i>RMI1</i>     | 1.309E-11 |
| High | Alternative Lengthening Telomere | <i>RNASEH1</i>  | 0.02288   |
| High | Alternative Lengthening Telomere | <i>RPA1</i>     | 2.311E-11 |
| High | Alternative Lengthening Telomere | <i>RPA2</i>     | 0.02212   |
| High | Alternative Lengthening Telomere | <i>RPA3</i>     | 2.614E-14 |
| High | Alternative Lengthening Telomere | <i>RPA4</i>     | 0.001006  |
| High | Alternative Lengthening Telomere | <i>SMC6</i>     | 0.005371  |
| High | Alternative Lengthening Telomere | <i>SP100</i>    | 0.002988  |
| High | Alternative Lengthening Telomere | <i>TIPIN</i>    | 2.2E-16   |
| High | Alternative Lengthening Telomere | <i>TOP3A</i>    | 1.792E-07 |
| High | Alternative Lengthening Telomere | <i>WRN</i>      | 0.004538  |
| High | Alternative Lengthening Telomere | <i>ZNF827</i>   | 2.2E-16   |
| Low  | Telomerase                       | <i>DKC1</i>     | 2.2E-16   |
| Low  | Telomerase                       | <i>EXOSC3</i>   | 2.2E-16   |
| Low  | Telomerase                       | <i>NCBP2</i>    | 2.2E-16   |
| Low  | Telomerase                       | <i>RUVBL1</i>   | 2.2E-16   |
| Low  | Telomerase                       | <i>RUVBL2</i>   | 2.2E-16   |
| Low  | Telomerase                       | <i>NOP10</i>    | 7.826E-15 |
| Low  | Telomerase                       | <i>GAR1</i>     | 1.018E-12 |
| Low  | Telomerase                       | <i>NCBP1</i>    | 2.823E-08 |
| Low  | Telomerase                       | <i>NHP2</i>     | 1.735E-07 |
| Low  | Telomerase                       | <i>HSP90AB1</i> | 2.009E-07 |
| Low  | Telomerase                       | <i>PTGES3</i>   | 2.742E-07 |
| Low  | Telomerase                       | <i>KPNA1</i>    | 4.551E-07 |
| Low  | Telomerase                       | <i>ABL1</i>     | 9.298E-07 |
| Low  | Telomerase                       | <i>ZCCHC8</i>   | 6.154E-06 |
| Low  | Telomerase                       | <i>TERC</i>     | 7.012E-06 |

|     |            |                 |            |
|-----|------------|-----------------|------------|
| Low | Telomerase | <i>FXR1</i>     | 0.00001383 |
| Low | Telomerase | <i>ZCCHC7</i>   | 0.00005004 |
| Low | Telomerase | <i>IPO7</i>     | 0.0000544  |
| Low | Telomerase | <i>KPNB1</i>    | 0.0001605  |
| Low | Telomerase | <i>HSP90AA1</i> | 0.0001931  |
| Low | Telomerase | <i>WRAP53</i>   | 0.0003903  |
| Low | Telomerase | <i>SRRT</i>     | 0.002331   |
| Low | Telomerase | <i>RANBP2</i>   | 0.01758    |
| Low | Telomerase | <i>HSPA1A</i>   | 0.04167    |
| Low | Telomerase | <i>DCP2</i>     | 0.1433     |
| Low | Telomerase | <i>STUB1</i>    | 0.2036     |
| Low | Telomerase | <i>XRN1</i>     | 0.27       |
| Low | Telomerase | <i>PAPD5</i>    | 0.3913     |
| Low | Telomerase | <i>PARN</i>     | 0.3961     |
| Low | Telomerase | <i>DIS3</i>     | 0.6799     |
| Low | Telomerase | <i>EXOSC10</i>  | 0.7589     |
