# Supplementary material for: Alternative lengthening of telomeres is mechanistically linked to potential therapeutic vulnerability in the stem‐like subtype of gastric cancer
Source: PubMed Central journal article supplement (PMC8438564; doi:10.1002/ctm2.561), 2021-09-14
Supplement: CTM2-11-e561-s004.pdf [file CTM2-11-e561-s004.pdf]

Table S5. List of NR2F2 binding prediction

| TF         | JASPAR ID | Class             | Family             | Tax Group     | IC          | GC Content  | Target gene hits | Target gene non-hits | Background gene hits | Background gene non-hits | Target TFBS hits | Target TFBS nucleotide rate | Background TFBS hits | Background TFBS nucleotide rate | Z-score   | Fisher score |       |        |
|------------|-----------|-------------------|--------------------|---------------|-------------|-------------|------------------|----------------------|----------------------|--------------------------|------------------|-----------------------------|----------------------|---------------------------------|-----------|--------------|-------|--------|
| RREB1      | MA0073.1  | Zinc-coordinating | BetaBetaAlpha-zinc | finger        | vertebrates | 22.278      | 0.623            | 1                    | 0                    | 1520                     | 23232            | 4                           | 0.00622              | 1839                            | 0.00102   | 18.307       | 2.79  |        |
| PPARG-RXR  | MA0065.2  | Zinc-coordinating | Hormone-nuclear    | Receptor      | vertebrates | 11.663      | 0.547            | 1                    | 0                    | 6067                     | 18685            | 10                          | 0.0117               | 11080                           | 0.00462   | 11.714       | 1.406 |        |
| MZF1_5-13  | MA0057.1  | Zinc-coordinating | BetaBetaAlpha-zinc | finger        | vertebrates | 9.4         | 0.588            | 1                    | 0                    | 13425                    | 11327            | 47                          | 0.0365               | 77649                           | 0.0216    | 11.644       | 0.612 |        |
| MZF1_1-4   | MA0056.1  | Zinc-coordinating | BetaBetaAlpha-zinc | finger        | vertebrates | 8.586       | 0.725            | 1                    | 0                    | 16863                    | 7889             | 107                         | 0.0499               | 201000                          | 0.0335    | 10.304       | 0.384 |        |
| SP1B       | MA0081.1  | Winged            | Helix-Turn-Helix   | Ets           | vertebrates | 9.06        | 0.466            | 1                    | 0                    | 17547                    | 7205             | 92                          | 0.0501               | 175639                          | 0.0342    | 9.899        | 0.344 |        |
| PLAG1      | MA0163.1  | Zinc-coordinating | BetaBetaAlpha-zinc | finger        | vertebrates | 19.352      | 0.798            | 1                    | 0                    | 1971                     | 22781            | 3                           | 0.00326              | 2462                            | 0.000958  | 8.316        | 2.53  |        |
| RXRA-VDR   | MA0074.1  | Zinc-coordinating | Hormone-nuclear    | Receptor      | vertebrates | 20.451      | 0.527            | 1                    | 0                    | 453                      | 24299            | 1                           | 0.00117              | 475                             | 0.000198  | 7.49         | 3.99  |        |
| SP1        | MA0080.2  | Winged            | Helix-Turn-Helix   | Ets           | vertebrates | 9.64        | 0.435            | 1                    | 0                    | 15792                    | 8960             | 49                          | 0.0267               | 95792                           | 0.0186    | 6.701        | 0.449 |        |
| FOXO3      | MA0157.1  | Winged            | Helix-Turn-Helix   | Forkhead      | vertebrates | 11.734      | 0.298            | 1                    | 0                    | 13611                    | 11141            | 36                          | 0.0224               | 69410                           | 0.0154    | 6.365        | 0.598 |        |
| FEV        | MA0156.1  | Winged            | Helix-Turn-Helix   | Ets           | vertebrates | 12.121      | 0.442            | 1                    | 0                    | 15402                    | 9350             | 41                          | 0.0255               | 81722                           | 0.0182    | 6.19         | 0.474 |        |
| CTCF       | MA0139.1  | Zinc-coordinating | BetaBetaAlpha-zinc | finger        | vertebrates | 17.205      | 0.645            | 1                    | 0                    | 3236                     | 21516            | 3                           | 0.00443              | 3982                            | 0.0021    | 5.669        | 2.034 |        |
| HNFA4      | MA0114.1  | Zinc-coordinating | Hormone-nuclear    | Receptor      | vertebrates | 9.617       | 0.522            | 1                    | 0                    | 6389                     | 18363            | 7                           | 0.00707              | 11240                           | 0.00406   | 5.305        | 1.354 |        |
| NF-kappaB  | MA0061.1  | Ig-fold           | Rel                | vertebrate    | 13.345      | 0.621       | 1                | 8381                 | 16371                | 11                       | 0.00855          | 18865                       | 0.00524              | 5.135                           | 1.083     |              |       |        |
| CEBPA      | MA0102.2  | Zipper-Type       | Leucine            | Zipper        | vertebrates | 8.712       | 0.358            | 1                    | 0                    | 12828                    | 11924            | 27                          | 0.0189               | 55606                           | 0.0139    | 4.787        | 0.657 |        |
| IRF2       | MA0051.1  | Winged            | Helix-Turn-Helix   | IRF           | vertebrates | 21.134      | 0.412            | 1                    | 0                    | 844                      | 23908            | 1                           | 0.0014               | 923                             | 0.000462  | 4.745        | 3.377 |        |
| Ddi3-CebpA | MA0019.1  | Zipper-Type       | Leucine            | Zipper        | vertebrates | 11.652      | 0.483            | 1                    | 0                    | 5576                     | 19176            | 6                           | 0.0056               | 9754                            | 0.00325   | 4.592        | 1.49  |        |
| SP1        | MA0079.2  | Zinc-coordinating | BetaBetaAlpha-zinc | finger        | vertebrates | 11.129      | 0.82             | 1                    | 0                    | 12391                    | 12361            | 36                          | 0.028                | 79797                           | 0.0222    | 4.444        | 0.692 |        |
| ESR2       | MA0258.1  | Zinc-coordinating | Hormone-nuclear    | Receptor      | vertebrates | 13.618      | 0.546            | 1                    | 0                    | 2219                     | 22533            | 2                           | 0.0028               | 2670                            | 0.00134   | 4.422        | 2.411 |        |
| HNFA1      | MA0046.1  | Helix-Turn-Helix  | Homeo              | vertebrate    | 15.548      | 0.259       | 1                | 3044                 | 21708                | 3                        | 0.00326          | 4352                        | 0.00169              | 3                               | 4.228     | 2.095        |       |        |
| NFATC2     | MA0152.1  | Ig-fold           | Rel                | vertebrate    | 9.859       | 0.346       | 1                | 0                    | 15176                | 9576                     | 44               | 0.0239                      | 97757                | 0.019                           | 4.058     | 0.489        |       |        |
| Nobox      | MA0125.1  | Helix-Turn-Helix  | Homeo              | vertebrate    | 9.573       | 0.26        | 1                | 0                    | 13558                | 11194                    | 35               | 0.0218                      | 77190                | 0.0172                          | 3.987     | 0.602        |       |        |
| NR4A2      | MA0160.1  | Zinc-coordinating | Hormone-nuclear    | Receptor      | vertebrates | 10.165      | 0.491            | 1                    | 0                    | 18396                    | 10856            | 28                          | 0.0174               | 60034                           | 0.0133    | 3.98         | 0.577 |        |
| TDAD1      | MA0090.1  | Helix-Turn-Helix  | Homeo              | vertebrate    | 15.678      | 0.507       | 1                | 0                    | 5222                 | 19530                    | 5                | 0.00466                     | 8446                 | 0.00282                         | 3.871     | 1.556        |       |        |
| FOXO1      | MA0031.1  | Winged            | Helix-Turn-Helix   | Forkhead      | vertebrates | 11.926      | 0.275            | 1                    | 0                    | 13087                    | 11665            | 29                          | 0.018                | 62921                           | 0.014     | 3.869        | 0.637 |        |
| Gata1      | MA0035.2  | Zinc-coordinating | GATA               | vertebrate    | 10.878      | 0.373       | 1                | 0                    | 14350                | 10402                    | 33               | 0.0282                      | 75905                | 0.0232                          | 3.748     | 0.545        |       |        |
| NFKB1      | MA0105.1  | Ig-fold           | Rel                | vertebrate    | 15.627      | 0.758       | 1                | 0                    | 3946                 | 20806                    | 4                | 0.00342                     | 6372                 | 0.00195                         | 3.688     | 1.836        |       |        |
| INSM1      | MA0155.1  | Zinc-coordinating | BetaBetaAlpha-zinc | finger        | vertebrates | 14.862      | 0.667            | 1                    | 0                    | 7588                     | 17164            | 9                           | 0.00839              | 17685                           | 0.0059    | 3.642        | 1.182 |        |
| SRF        | MA0083.1  | Other             | Alpha-Helix        | MADS          | vertebrates | 17.965      | 0.466            | 1                    | 0                    | 908                      | 23844            | 1                           | 0.000933             | 1019                            | 0.00034   | 3.41         | 3.304 |        |
| Zfx        | MA0146.1  | Zinc-coordinating | BetaBetaAlpha-zinc | finger        | vertebrates | 13.077      | 0.749            | 1                    | 0                    | 9872                     | 14880            | 15                          | 0.0163               | 33238                           | 0.0129    | 3.367        | 0.919 |        |
| Sox17      | MA0078.1  | Other             | Alpha-Helix        | High Mobility | Group       | vertebrates | 10.502           | 0.384                | 1                    | 0                        | 10873            | 0                           | 0.0203               | 13879                           | 0.0173    | 29           | 65883 | 0.0165 |
| TBP        | MA0108.2  | Beta-sheet        | TATA-binding       | vertebrate    | 10.086      | 0.377       | 1                | 0                    | 10389                | 14363                    | 15               | 0.0175                      | 33775                | 0.0141                          | 3.246     | 0.868        |       |        |
| Nr2e3      | MA0164.1  | Zinc-coordinating | Hormone-nuclear    | Receptor      | vertebrates | 12.028      | 0.373            | 1                    | 0                    | 6354                     | 18398            | 7                           | 0.00381              | 12287                           | 0.00239   | 3.205        | 1.36  |        |
| IRF1       | MA0050.1  | Winged            | Helix-Turn-Helix   | IRF           | vertebrates | 16.008      | 0.383            | 1                    | 0                    | 6075                     | 18677            | 6                           | 0.0056               | 11517                           | 0.00384   | 3.149        | 1.405 |        |
| ZNF354C    | MA0130.1  | Zinc-coordinating | BetaBetaAlpha-zinc | finger        | vertebrates | 8.958       | 0.615            | 1                    | 0                    | 17566                    | 7186             | 85                          | 0.0396               | 207738                          | 0.0346    | 3.081        | 0.343 |        |
| Klf4       | MA0039.2  | Zinc-coordinating | BetaBetaAlpha-zinc | finger        | vertebrates | 12.618      | 0.771            | 1                    | 0                    | 13645                    | 11107            | 7                           | 0.0288               | 88731                           | 0.0247    | 2.972        | 0.596 |        |
| Pax6       | MA0069.1  | Helix-Turn-Helix  | Homeo              | vertebrate    | 13.798      | 0.432       | 1                | 0                    | 1218                 | 23534                    | 1                | 0.00109                     | 1377                 | 0.000536                        | 2.518     | 3.011        |       |        |
| Myb        | MA0100.1  | Helix-Turn-Helix  | Myb                | vertebrate    | 9.883       | 0.591       | 1                | 0                    | 13518                | 11234                    | 25               | 0.0155                      | 58600                | 0.013                           | 2.48      | 0.605        |       |        |
| ZEB1       | MA0103.1  | Zinc-coordinating | BetaBetaAlpha-zinc | finger        | vertebrates | 8.305       | 0.557            | 1                    | 0                    | 17454                    | 7298             | 69                          | 0.0322               | 171132                          | 0.0285    | 2.458        | 0.349 |        |
| REL        | MA0101.1  | Ig-fold           | Rel                | vertebrate    | 10.515      | 0.559       | 1                | 0                    | 10514                | 14238                    | 13               | 0.0101                      | 29250                | 0.00813                         | 2.448     | 0.856        |       |        |
| RUNX1      | MA0002.2  | Ig-fold           | Runt               | vertebrate    | 10.401      | 0.502       | 1                | 0                    | 13641                | 11111                    | 24               | 0.0205                      | 58648                | 0.0179                          | 2.184     | 0.596        |       |        |
| STAT1      | MA0137.2  | Ig-fold           | Stat               | vertebrate    | 13.119      | 0.452       | 1                | 0                    | 6394                 | 18358                    | 5                | 0.00583                     | 10990                | 0.00458                         | 2.032     | 1.353        |       |        |
| ELF5       | MA0136.1  | Winged            | Helix-Turn-Helix   | Ets           | vertebrates | 8.693       | 0.429            | 1                    | 0                    | 16547                    | 8205             | 46                          | 0.0322               | 117435                          | 0.0294    | 1.861        | 0.403 |        |
| E2F1       | MA0024.1  | Winged            | Helix-Turn-Helix   | E2F           | vertebrates | 13.838      | 0.625            | 1                    | 0                    | 8113                     | 16639            | 8                           | 0.00497              | 17630                           | 0.00392   | 1.845        | 1.115 |        |
| Prrx2      | MA0075.1  | Helix-Turn-Helix  | Homeo              | vertebrate    | 9.063       | 0.027       | 1                | 0                    | 15063                | 9689                     | 48               | 0.0187                      | 123270               | 0.0171                          | 1.301     | 0.497        |       |        |
| YY1        | MA0095.1  | Zinc-coordinating | BetaBetaAlpha-zinc | finger        | vertebrates | 8.101       | 0.51             | 1                    | 0                    | 17190                    | 7562             | 63                          | 0.0294               | 165054                          | 0.0275    | 1.264        | 0.365 |        |
| Arnt-Ahr   | MA0006.1  | Zipper-Type       | Helix-Loop-Helix   | vertebrate    | 9.532       | 0.715       | 1                | 0                    | 13597                | 11155                    | 26               | 0.0121                      | 66086                | 0.011                           | 1.161     | 0.599        |       |        |
| FOXA1      | MA0148.1  | Winged            | Helix-Turn-Helix   | Forkhead      | vertebrates | 12.533      | 0.332            | 1                    | 0                    | 13355                    | 11397            | 24                          | 0.0205               | 63112                           | 0.0193    | 0.981        | 0.617 |        |
| Zfp423     | MA0116.1  | Zinc-coordinating | BetaBetaAlpha-zinc | finger        | vertebrates | 17.925      | 0.679            | 1                    | 0                    | 5691                     | 19061            | 4                           | 0.00466              | 10149                           | 0.00423   | 0.689        | 1.47  |        |
| Lhx3       | MA0135.1  | Helix-Turn-Helix  | Homeo              | vertebrate    | 16.354      | 0.131       | 1                | 0                    | 5806                 | 18946                    | 5                | 0.00505                     | 12758                | 0.00461                         | 0.678     | 1.45         |       |        |
| Esrrb      | MA0141.1  | Zinc-coordinating | Hormone-nuclear    | Receptor      | vertebrates | 12.806      | 0.524            | 1                    | 0                    | 10167                    | 14585            | 10                          | 0.00933              | 26346                           | 0.00878   | 0.612        | 0.89  |        |
| NR2F1      | MA0017.1  | Zinc-coordinating | Hormone-nuclear    | Receptor      | vertebrates | 15.924      | 0.478            | 1                    | 0                    | 3735                     | 21017            | 2                           | 0.00218              | 5073                            | 0.00197   | 0.419        | 1.891 |        |
| Foxa2      | MA0047.2  | Winged            | Helix-Turn-Helix   | Forkhead      | vertebrates | 13.268      | 0.315            | 1                    | 0                    | 11656                    | 13096            | 16                          | 0.0149               | 43535                           | 0.0145    | 0.349        | 0.753 |        |
| Evi1       | MA0029.1  | Zinc-coordinating | BetaBetaAlpha-zinc | finger        | vertebrates | 17.909      | 0.28             | 1                    | 0                    | 1931                     | 22821            | 1                           | 0.00109              | 2457                            | 0.000956  | 0.343        | 2.55  |        |
| ELK1       | MA0028.1  | Winged            | Helix-Turn-Helix   | Ets           | vertebrates | 8.812       | 0.568            | 1                    | 0                    | 13642                    | 11110            | 20                          | 0.0155               | 54748                           | 0.0152    | 0.272        | 0.596 |        |
| Gfi        | MA0038.1  | Zinc-coordinating | BetaBetaAlpha-zinc | finger        | vertebrates | 9.47        | 0.391            | 1                    | 0                    | 13731                    | 11021            | 24                          | 0.0187               | 65844                           | 0.0183    | 0.27         | 0.589 |        |
| RORA_1     | MA0071.1  | Zinc-coordinating | Hormone-nuclear    | Receptor      | vertebrates | 13.119      | 0.424            | 1                    | 0                    | 8624                     | 16128            | 7                           | 0.00544              | 18895                           | 0.00525   | 0.238        | 1.054 |        |
| MIZF       | MA0131.1  | Zinc-coordinating | BetaBetaAlpha-zinc | finger        | vertebrates | 13.197      | 0.61             | 1                    | 0                    | 2080                     | 22672            | 1                           | 0.000777             | 2497                            | 0.000694  | 0.192        | 2.476 |        |
| AP1        | MA0099.2  | Zipper-Type       | Leucine            | Zipper        | vertebrates | 9.193       | 0.405            | 1                    | 0                    | 16390                    | 8362             | 41                          | 0.0223               | 113253                          | 0.022     | 0.185        | 0.412 |        |
| Pdx1       | MA0132.1  | Helix-Turn-Helix  | Homeo              | vertebrate    | 9.04        | 0.194       | 1                | 0                    | 15507                | 9245                     | 51               | 0.0238                      | 140973               | 0.0235                          | 0.181     | 0.468        |       |        |
| HOXA5      | MA0158.1  | Helix-Turn-Helix  | Homeo              | vertebrate    | 8.759       | 0.315       | 1                | 0                    | 17629                | 7123                     | 74               | 0.0046                      | 205993               | 0.0458                          | 0.099     | 0.339        |       |        |
| Sox5       | MA0087.1  | Other             | Alpha-Helix        | High Mobility | Group       | vertebrates | 10.831           | 0.199                | 1                    | 0                        | 10873            | 0                           | 0.0203               | 13879                           | 0.0173    | 29           | 65883 | 0.0165 |
| RELA       | MA0107.1  | Ig-fold           | Rel                | vertebrate    | 14.757      | 0.567       | 1                | 0                    | 7171                 | 17581                    | 5                | 0.00389                     | 13690                | 0.0038                          | 0.08      | 1.239        |       |        |
| Foxq1      | MA0040.1  | Winged            | Helix-Turn-Helix   | Forkhead      | vertebrates | 14.07       | 0.202            | 1                    | 0                    | 8007                     | 16745            | 8                           | 0.00684              | 22088                           | 0.00675   | 0.069        | 1.129 |        |
| Nko2-5     | MA0063.1  | Helix-Turn-Helix  | Homeo              | vertebrate    | 8.27        | 0.218       | 1                | 0                    | 16973                | 7779                     | 70               | 0.0381                      | 197210               | 0.0384                          | -0.185    | 0.377        |       |        |
| SOX9       | MA0077.1  | Other             | Alpha-Helix        | High Mobility | Group       | vertebrates | 9.079            | 0.358                | 1                    | 0                        | 10873            | 0                           | 0.0203               | 13879                           | 0.0173    | 29           | 65883 | 0.0165 |
| Spz1       | MA0111.1  | Other             | Other              | vertebrate    | 11.907      | 0.538       | 1                | 0                    | 18094                | 1                        | 4                | -0.824                      | 12530                | 0.00383                         | -0.824    | 1.313        |       |        |
| HNFB1      | MA0153.1  | Helix-Turn-Helix  | Homeo              | vertebrate    | 16.821      | 0.222       | 1                | 0                    | 4107                 | 20645                    | 2                | 0.00187                     | 6910                 | 0.0023                          | -1.13     | 1.796        |       |        |
| Sox2       | MA0143.1  | Other             | Alpha-Helix        | High Mobility | Group       | vertebrates | 12.951           | 0.361                | 1                    | 0                        | 10873            | 0                           | 0.0203               | 13879                           | 0.0173    | 29           | 65883 | 0.0165 |
| PPARG      | MA0066.1  | Zinc-coordinating | Hormone-nuclear    | Receptor      | vertebrates | 20.365      | 0.523            | 0                    | 1                    | 62                       | 24690            | 0                           | 0                    | 64                              | 0.0000356 | -1.416       | 0     |        |
| NR1H2-RXR  | MA0115.1  | Zinc-coordinating | Hormone-nuclear    | Receptor      | vertebrates | 27.878      | 0.445            | 0                    | 1                    | 99                       | 24653            | 0                           | 0                    | 100                             | 0.0000472 | -1.421       | 0     |        |
| Nko3-2     | MA0122.1  | Helix-Turn-Helix  | Homeo              | vertebrate    | 8.542       | 0.463       | 1                | 0                    | 15425                | 9327                     | 30               | 0.021                       | 91612                | 0.0229                          | -1.489    | 0.473        |       |        |
| Pax4       | MA0068.1  | Helix-Turn-Helix  | Homeo              | vertebrate    | 11.004      | 0.441       | 0                | 1                    | 112                  | 24640                    | 0                | 0                           | 113                  | 0.0000942                       | -1.555    | 0            |       |        |
| EWSR1-FL1  | MA0149.1  | Winged            | Helix-Turn-Helix   | Ets           | vertebrates | 32.871      | 0.554            | 0                    | 1                    | 207                      | 24545            | 0                           | 0                    | 209                             | 0.000105  |              |       |        |

|             |          |                        |                    |             |                 |            |             |       |   |       |       |         |          |            |          |          |        |        |
|-------------|----------|------------------------|--------------------|-------------|-----------------|------------|-------------|-------|---|-------|-------|---------|----------|------------|----------|----------|--------|--------|
| Egr1        | MA0162.1 | Zinc-coordinating      | BetaBetaAlpha-zinc | finger      | vertebrates     | 14.456     | 0.739       | 1     | 0 | 6364  | 18388 | 3       | 0.00256  | 12188      | 0.00373  | -2.233   | 1.358  |        |
| Foxd3       | MA0041.1 | Winged                 | Helix-Turn-Helix   | Forkhead    | vertebrates     | 12.945     | 0.223       | 1     | 0 | 11354 | 13398 | 15      | 0.014    | 49535      | 0.0165   | -2.283   | 0.779  |        |
| MAX         | MA0058.1 | Zipper-Type            | Helix-Loop-Helix   | vertebrate  |                 | 12.685     | 0.571       | 1     | 0 | 16759 | 4     | 0.00311 | 15900    | 0.00442    | -2.305   | 1.13     |        |        |
| Ar          | MA0007.1 | Zinc-coordinating      | Hormone-nuclear    | Receptor    | vertebrates     | 15.703     | 0.498       | 0     | 1 | 534   | 24218 | 0       | 0        | 554        | 0.000339 | -2.327   | 0      |        |
| TP53        | MA0106.1 | Zinc-coordinating      | Loop-Sheet-Helix   | vertebrate  |                 | 26.239     | 0.603       | 0     | 1 | 24744 | 0     | 0       | 8        | 0.00000445 | -2.33    | 0        |        |        |
| RORA_2      | MA0072.1 | Zinc-coordinating      | Hormone-nuclear    | Receptor    | vertebrates     | 17.425     | 0.369       | 1     | 0 | 3571  | 21181 | 1       | 0.00109  | 5079       | 0.00198  | -2.367   | 1.936  |        |
| NFIL3       | MA0025.1 | Zipper-Type            | Leucine            | Zipper      | vertebrates     | 14.139     | 0.265       | 1     | 0 | 6731  | 18021 | 4       | 0.00342  | 15828      | 0.00484  | -2.382   | 1.302  |        |
| TLX1:NFIC   | MA0119.1 | Helix-Turn-Helix:Other | Homeo:Nuclear      | Factor      | I-CCAAT-binding | vertebrate | 19.665      | 0.598 | 0 | 1     | 1066  | 23686   | 0        | 0          | 1162     | 0.000452 | -2.62  |        |
| ARID3A      | MA0151.1 | Helix-Turn-Helix       | Arid               | vertebrate  |                 | 9.896      | 0.062       | 1     | 0 | 16086 | 8666  | 51      | 0.0238   | 166235     | 0.0277   | -2.743   | 0.431  |        |
| SRV         | MA0084.1 | Other                  | Alpha-Helix        | High        | Mobility        | Group      | vertebrates | 9.193 | 0 | 0.238 | 1     | 0       | 14714    | 10038      | 31       | 0.0217   | 101929 | 0.0255 |
| USF1        | MA0093.1 | Zipper-Type            | Helix-Loop-Helix   | vertebrate  |                 | 11.29      | 0.643       | 1     | 0 | 9330  | 15422 | 5       | 0.00272  | 21993      | 0.00428  | -2.774   | 0.976  |        |
| Tcfcp2l1    | MA0145.1 | Other                  | CP2                | vertebrate  |                 | 11.65      | 0.609       | 1     | 0 | 10591 | 14161 | 9       | 0.00979  | 32190      | 0.0125   | -2.823   | 0.849  |        |
| HLF         | MA0043.1 | Zipper-Type            | Leucine            | Zipper      | vertebrates     | 11.147     | 0.394       | 1     | 0 | 5508  | 19244 | 2       | 0.00187  | 9969       | 0.00332  | -2.951   | 1.503  |        |
| T           | MA0009.1 | Beta-Hairpin-Ribbon    | T                  | vertebrate  |                 | 17.863     | 0.452       | 0     | 1 | 1811  | 22941 | 0       | 0        | 2114       | 0.000646 | -3.058   | 0      |        |
| PBX1        | MA0070.1 | Helix-Turn-Helix       | Homeo              | vertebrate  |                 | 14.641     | 0.31        | 1     | 0 | 4107  | 20645 | 1       | 0.000933 | 6634       | 0.00221  | -3.183   | 1.796  |        |
| RXR:RAR_DR5 | MA0159.1 | Zinc-coordinating      | Hormone-nuclear    | Receptor    | vertebrates     | 16.004     | 0.535       | 0     | 1 | 1313  | 23439 | 0       | 0        | 1499       | 0.000708 | -3.185   | 0      |        |
| Myf         | MA0055.1 | Zipper-Type            | Helix-Loop-Helix   | vertebrate  |                 | 15.914     | 0.609       | 1     | 0 | 10157 | 14595 | 7       | 0.00653  | 27519      | 0.00918  | -3.195   | 0.891  |        |
| Myc         | MA0147.1 | Zipper-Type            | Helix-Loop-Helix   | vertebrate  |                 | 11.157     | 0.686       | 1     | 0 | 8288  | 16464 | 4       | 0.00311  | 18476      | 0.00513  | -3.276   | 1.094  |        |
| Pax5        | MA0014.1 | Helix-Turn-Helix       | Homeo              | vertebrate  |                 | 12.432     | 0.575       | 0     | 1 | 1224  | 23528 | 0       | 0        | 1364       | 0.000758 | -3.284   | 0      |        |
| FOXF2       | MA0030.1 | Winged                 | Helix-Turn-Helix   | Forkhead    | vertebrates     | 14.824     | 0.334       | 1     | 0 | 4097  | 20655 | 1       | 0.00109  | 6459       | 0.00251  | -3.316   | 1.798  |        |
| CREB1       | MA0018.2 | Zipper-Type            | Leucine            | Zipper      | vertebrates     | 10.139     | 0.523       | 1     | 0 | 9204  | 15548 | 4       | 0.00249  | 19712      | 0.00438  | -3.321   | 0.989  |        |
| Arnt        | MA0004.1 | Zipper-Type            | Helix-Loop-Helix   | vertebrate  |                 | 10.992     | 0.642       | 1     | 0 | 7052  | 17700 | 2       | 0.000933 | 13904      | 0.00232  | -3.359   | 1.255  |        |
| znf143      | MA0088.1 | Zinc-coordinating      | BetaBetaAlpha-zinc | finger      | vertebrates     | 17.541     | 0.53        | 0     | 1 | 1301  | 23451 | 0       | 0        | 1473       | 0.000819 | -3.401   | 0      |        |
| Mycn        | MA0104.2 | Zipper-Type            | Helix-Loop-Helix   | vertebrate  |                 | 11.104     | 0.699       | 1     | 0 | 8332  | 16420 | 4       | 0.00311  | 18928      | 0.00526  | -3.433   | 1.089  |        |
| MEF2A       | MA0052.1 | Other                  | MADS               | vertebrates |                 | 15.709     | 0.179       | 1     | 0 | 7006  | 17746 | 3       | 0.00233  | 15631      | 0.00434  | -3.537   | 1.262  |        |
| Stat3       | MA0144.1 | Ig-fold                | Stat               | vertebrate  |                 | 13.601     | 0.505       | 1     | 0 | 9883  | 14869 | 5       | 0.00389  | 23645      | 0.00657  | -3.823   | 0.918  |        |
| ELK4        | MA0076.1 | Winged                 | Helix-Turn-Helix   | Ets         | vertebrates     | 14.123     | 0.583       | 1     | 0 | 6034  | 18718 | 1       | 0.0007   | 9342       | 0.00234  | -3.937   | 1.411  |        |
| Hand1:Tcf2a | MA0092.1 | Zipper-Type            | Helix-Loop-Helix   | vertebrate  |                 | 10.144     | 0.507       | 1     | 0 | 13286 | 11466 | 14      | 0.0109   | 54768      | 0.0152   | -4.054   | 0.622  |        |
| NFE2L2      | MA0150.1 | Zipper-Type            | Leucine            | Zipper      | vertebrates     | 14.394     | 0.486       | 1     | 0 | 5635  | 19117 | 1       | 0.000855 | 8970       | 0.00274  | -4.177   | 1.48   |        |
| HIF1A:ARNT  | MA0259.1 | Zipper-Type            | Helix-Loop-Helix   | vertebrate  |                 | 9.74       | 0.657       | 1     | 0 | 10914 | 18388 | 8       | 0.00497  | 37662      | 0.00837  | -4.278   | 0.819  |        |
| Tal1:Gata1  | MA0140.1 | Zipper-Type            | Helix-Loop-Helix   | vertebrate  |                 | 11.297     | 0.451       | 1     | 0 | 6212  | 18540 | 2       | 0.0028   | 11200      | 0.0056   | -4.32    | 1.382  |        |
| MYC:MAX     | MA0059.1 | Zipper-Type            | Helix-Loop-Helix   | vertebrate  |                 | 14.237     | 0.602       | 0     | 1 | 3436  | 21316 | 0       | 0        | 4535       | 0.00139  | -4.344   | 0      |        |
| NR3C1       | MA0113.1 | Zinc-coordinating      | Hormone-nuclear    | Receptor    | vertebrates     | 14.749     | 0.432       | 0     | 1 | 2522  | 22230 | 0       | 0        | 3161       | 0.00158  | -4.625   | 0      |        |
| NHLH1       | MA0048.1 | Zipper-Type            | Helix-Loop-Helix   | vertebrate  |                 | 14.132     | 0.674       | 1     | 0 | 5783  | 18969 | 1       | 0.000933 | 9874       | 0.00329  | -4.749   | 1.454  |        |
| NFYA        | MA0060.1 | Other                  | Alpha-Helix        | NFY         | CCAAT-binding   | vertebrate | 12.925      | 0.523 | 1 | 0     | 5865  | 18887   | 1        | 0.00124    | 9476     | 0.00421  | -5.268 |        |
| Pou5f1      | MA0142.1 | Helix-Turn-Helix       | Homeo              | vertebrate  |                 | 14.808     | 0.308       | 0     | 1 | 3402  | 21350 | 0       | 0        | 5205       | 0.00217  | -5.384   | 0      |        |
| GABPA       | MA0062.2 | Winged                 | Helix-Turn-Helix   | Ets         | vertebrates     | 13.335     | 0.647       | 1     | 0 | 9355  | 15397 | 2       | 0.00171  | 20927      | 0.0064   | -6.723   | 0.973  |        |
| FOXJ1       | MA0042.1 | Winged                 | Helix-Turn-Helix   | Forkhead    | vertebrates     | 13.183     | 0.263       | 1     | 0 | 11680 | 13072 | 8       | 0.00746  | 49366      | 0.0165   | -8.057   | 0.751  |        |
