# Supplementary material for: Alternative lengthening of telomeres is mechanistically linked to potential therapeutic vulnerability in the stem‐like subtype of gastric cancer
Source: PubMed Central journal article supplement (PMC8438564; doi:10.1002/ctm2.561), 2021-09-14
Supplement: CTM2-11-e561-s005.pdf [file CTM2-11-e561-s005.pdf]

**Table S1.** List of genes involved in the telomere maintenance mechanism

| TMM type                         | Pathway                          | Gene name       | Description                                                                                    |
|----------------------------------|----------------------------------|-----------------|------------------------------------------------------------------------------------------------|
| Alternative Lengthening Telomere | Homologous Recombination pathway | <i>WRN</i>      | WRN RecQ like helicase                                                                         |
| Alternative Lengthening Telomere | Homologous Recombination pathway | <i>AKTIP</i>    | AKT Interacting Protein                                                                        |
| Alternative Lengthening Telomere | Homologous Recombination pathway | <i>POLD4</i>    | DNA Polymerase Delta 4, Accessory Subunit                                                      |
| Alternative Lengthening Telomere | Homologous Recombination pathway | <i>POLD3</i>    | DNA Polymerase Delta 3, Accessory Subunit                                                      |
| Alternative Lengthening Telomere | Homologous Recombination pathway | <i>POLD1</i>    | DNA Polymerase Delta 1, Catalytic Subunit                                                      |
| Alternative Lengthening Telomere | Homologous Recombination pathway | <i>CBX5</i>     | Chromobox 5                                                                                    |
| Alternative Lengthening Telomere | Homologous Recombination pathway | <i>HIRA</i>     | Histone Cell Cycle Regulator                                                                   |
| Alternative Lengthening Telomere | Homologous Recombination pathway | <i>FANCD2</i>   | FA Complementation Group D2                                                                    |
| Alternative Lengthening Telomere | Homologous Recombination pathway | <i>TIMELESS</i> | Timeless Circadian Regulator                                                                   |
| Alternative Lengthening Telomere | Homologous Recombination pathway | <i>TIPIN</i>    | TIMELESS Interacting Protein                                                                   |
| Alternative Lengthening Telomere | Homologous Recombination pathway | <i>SMARCAL1</i> | SWI/SNF Related, Matrix Associated, Actin Dependent Regulator Of Chromatin, Subfamily A Like 1 |
| Alternative Lengthening Telomere | Homologous Recombination pathway | <i>PCNA</i>     | Proliferating Cell Nuclear Antigen                                                             |
| Alternative Lengthening Telomere | Homologous Recombination pathway | <i>CHEK1</i>    | Checkpoint Kinase 1                                                                            |
| Alternative Lengthening Telomere | Homologous Recombination pathway | <i>RNASEH1</i>  | Ribonuclease H1                                                                                |
| Alternative Lengthening Telomere | Homologous Recombination pathway | <i>MND1</i>     | Meiotic Nuclear Divisions 1                                                                    |
| Alternative Lengthening Telomere | Homologous Recombination pathway | <i>RAD51</i>    | RAD51 Recombinase                                                                              |
| Alternative Lengthening Telomere | Homologous Recombination pathway | <i>ATR</i>      | ATR Serine/Threonine Kinase                                                                    |
| Alternative Lengthening Telomere | Homologous Recombination pathway | <i>RAD52</i>    | RAD52 Homolog, DNA Repair Protein                                                              |
| Alternative Lengthening Telomere | Homologous Recombination pathway | <i>SLX1A</i>    | SLX1 Homolog A, Structure-Specific Endonuclease Subunit                                        |
| Alternative Lengthening Telomere | Homologous Recombination pathway | <i>SLX1B</i>    | SLX1 Homolog B, Structure-Specific Endonuclease Subunit                                        |
| Alternative Lengthening Telomere | Homologous Recombination pathway | <i>SLX4</i>     | SLX4 Structure-Specific Endonuclease Subunit                                                   |
| Alternative Lengthening Telomere | Homologous Recombination pathway | <i>BLM</i>      | BLM RecQ like helicase                                                                         |
| Alternative Lengthening Telomere | Homologous Recombination pathway | <i>RMI1</i>     | RecQ Mediated Genome Instability 1                                                             |
| Alternative Lengthening Telomere | Homologous Recombination pathway | <i>RMI2</i>     | RecQ Mediated Genome Instability 2                                                             |
| Alternative Lengthening Telomere | Homologous Recombination pathway | <i>PSMC3IP</i>  | PSMC3 Interacting Protein                                                                      |
| Alternative Lengthening Telomere | Homologous Recombination pathway | <i>TOP3A</i>    | DNA Topoisomerase III Alpha                                                                    |
| Alternative Lengthening Telomere | Homologous Recombination pathway | <i>POT1</i>     | protection of telomeres 1                                                                      |
| Alternative Lengthening Telomere | Homologous Recombination pathway | <i>RPA4</i>     | Replication Protein A4                                                                         |
| Alternative Lengthening Telomere | Homologous Recombination pathway | <i>RPA3</i>     | Replication Protein A3                                                                         |
| Alternative Lengthening Telomere | Homologous Recombination pathway | <i>HNRNPA1</i>  | Heterogeneous Nuclear Ribonucleoprotein A1                                                     |
| Alternative Lengthening Telomere | Homologous Recombination pathway | <i>RPA2</i>     | Replication Protein A2                                                                         |
| Alternative Lengthening Telomere | Homologous Recombination pathway | <i>FEN1</i>     | Flap Structure-Specific Endonuclease 1                                                         |
| Alternative Lengthening Telomere | Homologous Recombination pathway | <i>RPA1</i>     | Replication Protein A1                                                                         |
| Alternative Lengthening Telomere | Homologous Recombination pathway | <i>RFC1</i>     | Replication Factor C Subunit 1                                                                 |
| Alternative Lengthening Telomere | Homologous Recombination pathway | <i>BRCA2</i>    | BRCA2 DNA Repair Associated                                                                    |

|                                  |                                |                |                                                                  |
|----------------------------------|--------------------------------|----------------|------------------------------------------------------------------|
| Alternative Lengthening Telomere | Chromatin Decompaction pathway | <i>NR2C2</i>   | Nuclear Receptor Subfamily 2 Group C Member 2                    |
| Alternative Lengthening Telomere | Chromatin Decompaction pathway | <i>NR2F2</i>   | nuclear receptor subfamily 2 group F member 2                    |
| Alternative Lengthening Telomere | Chromatin Decompaction pathway | <i>SUV39H2</i> | Suppressor Of Variegation 3-9 Homolog 2                          |
| Alternative Lengthening Telomere | Chromatin Decompaction pathway | <i>SUV39H1</i> | Suppressor Of Variegation 3-9 Homolog 1                          |
| Alternative Lengthening Telomere | Chromatin Decompaction pathway | <i>HDAC1</i>   | histone deacetylase 1                                            |
| Alternative Lengthening Telomere | Chromatin Decompaction pathway | <i>HDAC2</i>   | histone deacetylase 2                                            |
| Alternative Lengthening Telomere | Chromatin Decompaction pathway | <i>ZNF827</i>  | Zinc Finger Protein 827                                          |
| Alternative Lengthening Telomere | Chromatin Decompaction pathway | <i>KMT5C</i>   | Lysine Methyltransferase 5C                                      |
| Alternative Lengthening Telomere | Chromatin Decompaction pathway | <i>KMT5B</i>   | Lysine Methyltransferase 5B                                      |
| Alternative Lengthening Telomere | Chromatin Decompaction pathway | <i>HDAC9</i>   | Histone Deacetylase 9                                            |
| Alternative Lengthening Telomere | PML pathway                    | <i>SP100</i>   | SP100 Nuclear Antigen                                            |
| Alternative Lengthening Telomere | PML pathway                    | <i>BRCA1</i>   | BRCA1 DNA Repair Associated                                      |
| Alternative Lengthening Telomere | PML pathway                    | <i>PML</i>     | Promyelocytic Leukemia                                           |
| Alternative Lengthening Telomere | PML pathway                    | <i>GEN1</i>    | GEN1 Holliday Junction 5' Flap Endonuclease                      |
| Alternative Lengthening Telomere | PML pathway                    | <i>MUS81</i>   | MUS81 Structure-Specific Endonuclease Subunit                    |
| Alternative Lengthening Telomere | PML pathway                    | <i>EME1</i>    | Essential Meiotic Structure-Specific Endonuclease 1              |
| Alternative Lengthening Telomere | PML pathway                    | <i>NBN</i>     | nibrin                                                           |
| Alternative Lengthening Telomere | PML pathway                    | <i>MRE11A</i>  | MRE11 homolog, double strand break repair nuclease               |
| Alternative Lengthening Telomere | PML pathway                    | <i>RAD50</i>   | RAD50 double strand break repair protein                         |
| Alternative Lengthening Telomere | PML pathway                    | <i>SMC5</i>    | Structural Maintenance Of Chromosomes 5                          |
| Alternative Lengthening Telomere | PML pathway                    | <i>SMC6</i>    | Structural Maintenance Of Chromosomes 6                          |
| Alternative Lengthening Telomere | PML pathway                    | <i>NSMCE2</i>  | NSE2 (MMS21) Homolog, SMC5-SMC6 Complex SUMO Ligase              |
| Alternative Lengthening Telomere | Telomere Instability           | <i>ATRX</i>    | ATRX Chromatin Remodeler                                         |
| Alternative Lengthening Telomere | Telomere Instability           | <i>DAXX</i>    | Death Domain Associated Protein                                  |
| Alternative Lengthening Telomere | Telomere Instability           | <i>FEN1</i>    | Flap Structure-Specific Endonuclease 1                           |
| Alternative Lengthening Telomere | Telomere Instability           | <i>TERT</i>    | telomerase reverse transcriptase                                 |
| Telomerase                       | TERT pathway                   | <i>KPNA1</i>   | Karyopherin Subunit Alpha 1                                      |
| Telomerase                       | TERT pathway                   | <i>KPNB1</i>   | Karyopherin Subunit Beta 1                                       |
| Telomerase                       | TERT pathway                   | <i>IPO7</i>    | Importin 7                                                       |
| Telomerase                       | TERT pathway                   | <i>HSPA1A</i>  | Heat Shock Protein Family A (Hsp70) Member 1A                    |
| Telomerase                       | TERT pathway                   | <i>PTGES3</i>  | Prostaglandin E Synthase 3                                       |
| Telomerase                       | TERT pathway                   | <i>RANBP2</i>  | RAN Binding Protein 2                                            |
| Telomerase                       | TERT pathway                   | <i>XRN1</i>    | 5'-3' Exoribonuclease 1                                          |
| Telomerase                       | TERT pathway                   | <i>DCP2</i>    | Decapping MRNA 2                                                 |
| Telomerase                       | TERT pathway                   | <i>EXOSC3</i>  | Exosome Component 3                                              |
| Telomerase                       | TERT pathway                   | <i>DIS3</i>    | DIS3 Homolog, Exosome Endoribonuclease And 3'-5' Exoribonuclease |
| Telomerase                       | TERT pathway                   | <i>PKC</i>     | Protein Kinase C Alpha                                           |

|            |                   |                 |                                                                 |
|------------|-------------------|-----------------|-----------------------------------------------------------------|
| Telomerase | TERT pathway      | <i>ACD</i>      | ACD shelterin complex subunit and telomerase recruitment factor |
| Telomerase | TERT pathway      | <i>PINX1</i>    | PIN2 (TERF1) Interacting Telomerase Inhibitor 1                 |
| Telomerase | TERT pathway      | <i>TNKS1BP1</i> | Tankyrase 1 Binding Protein 1                                   |
| Telomerase | TERT pathway      | <i>TERF2IP</i>  | TERF2 interacting protein                                       |
| Telomerase | TERT pathway      | <i>WRAP53</i>   | WD Repeat Containing Antisense To TP53                          |
| Telomerase | TERT pathway      | <i>HSP90AA1</i> | heat shock protein 90 alpha family class A member 1             |
| Telomerase | TERT pathway      | <i>HSP90AA2</i> | Heat Shock Protein 90 Alpha Family Class A Member 2, Pseudogene |
| Telomerase | TERT pathway      | <i>HSP90AB1</i> | Heat Shock Protein 90 Alpha Family Class B Member 1             |
| Telomerase | TERT pathway      | <i>ATM</i>      | ATM Serine/Threonine Kinase                                     |
| Telomerase | TERT pathway      | <i>HSP90</i>    | Heat Shock Protein 90 Alpha Family Class A Member 1             |
| Telomerase | TERT pathway      | <i>ABL1</i>     | ABL Proto-Oncogene 1, Non-Receptor Tyrosine Kinase              |
| Telomerase | TERT pathway      | <i>STUB1</i>    | STIP1 Homology And U-Box Containing Protein 1                   |
| Telomerase | TERT pathway      | <i>TERT</i>     | telomerase reverse transcriptase                                |
| Telomerase | TERC_DKC1 pathway | <i>SRR1</i>     | Serrate, RNA Effector Molecule                                  |
| Telomerase | TERC_DKC1 pathway | <i>NCBP2</i>    | Nuclear Cap Binding Protein Subunit 2                           |
| Telomerase | TERC_DKC1 pathway | <i>NCBP1</i>    | Nuclear Cap Binding Protein Subunit 1                           |
| Telomerase | TERC_DKC1 pathway | <i>EXOSC10</i>  | Exosome Component 10                                            |
| Telomerase | TERC_DKC2 pathway | <i>ZCCHC7</i>   | Zinc Finger CCHC-Type Containing 7                              |
| Telomerase | TERC_DKC1 pathway | <i>ZCCHC8</i>   | Zinc Finger CCHC-Type Containing 8                              |
| Telomerase | TERC_DKC1 pathway | <i>MTR4</i>     | Mtr4 Exosome RNA Helicase                                       |
| Telomerase | TERC_DKC1 pathway | <i>PAPD5</i>    | Terminal Nucleotidyltransferase 4B                              |
| Telomerase | TERC_DKC1 pathway | <i>PABPN1</i>   | Poly(A) Binding Protein Nuclear 1                               |
| Telomerase | TERC_DKC1 pathway | <i>PARN</i>     | Poly(A)-Specific Ribonuclease                                   |
| Telomerase | TERC_DKC1 pathway | <i>FXR1</i>     | FMR1 Autosomal Homolog 1                                        |
| Telomerase | TERC_DKC1 pathway | <i>NAF1</i>     | Nuclear Assembly Factor 1 Ribonucleoprotein                     |
| Telomerase | TERC_DKC1 pathway | <i>GAR1</i>     | GAR1 Ribonucleoprotein                                          |
| Telomerase | TERC_DKC1 pathway | <i>NOP10</i>    | NOP10 Ribonucleoprotein                                         |
| Telomerase | TERC_DKC1 pathway | <i>NHP2</i>     | NHP2 Ribonucleoprotein                                          |
| Telomerase | TERC_DKC1 pathway | <i>RUVBL1</i>   | RuvB Like AAA ATPase 1                                          |
| Telomerase | TERC_DKC1 pathway | <i>RUVBL2</i>   | RuvB Like AAA ATPase 2                                          |
| Telomerase | TERC_DKC2 pathway | <i>TERC</i>     | Telomerase RNA Component                                        |
| Telomerase | TERC_DKC3 pathway | <i>DKC1</i>     | dyskerin pseudouridine synthase 1                               |

---
