# Supplementary material for: Alternative lengthening of telomeres is mechanistically linked to potential therapeutic vulnerability in the stem‐like subtype of gastric cancer
Source: PubMed Central journal article supplement (PMC8438564; doi:10.1002/ctm2.561), 2021-09-14
Supplement: CTM2-11-e561-s006.pdf [file CTM2-11-e561-s006.pdf]

**Table S3.** List of significant gene ontology (GO) terms enriched in the ALT-like group and non ALT group

| Chromatin Decompaction Type | Prognosis | Category                | Term          | Description                               | LogP     | Log(q-value) |
|-----------------------------|-----------|-------------------------|---------------|-------------------------------------------|----------|--------------|
| High                        | Poor      | GO Biological Processes | GO:0006397    | mRNA processing                           | -10.589  | -6.269871994 |
| High                        | Poor      | GO Biological Processes | GO:0016570    | histone modification                      | -9.05492 | -5.250122606 |
| High                        | Poor      | GO Biological Processes | GO:1902275    | regulation of chromatin organization      | -8.98277 | -5.250122606 |
| High                        | Poor      | GO Biological Processes | GO:0044257    | cellular protein catabolic process        | -8.5671  | -4.951781437 |
| High                        | Poor      | GO Biological Processes | GO:0006914    | autophagy                                 | -8.42579 | -4.951781437 |
| High                        | Poor      | Reactome Gene Sets      | R-HSA-3247509 | Chromatin modifying enzymes               | -7.62659 | -4.483576345 |
| High                        | Poor      | GO Biological Processes | GO:0007017    | microtubule-based process                 | -7.05963 | -3.944639698 |
| High                        | Poor      | Reactome Gene Sets      | R-HSA-983168  | Antigen processing: Ubiquitination & F    | -6.47015 | -3.429800576 |
| High                        | Poor      | GO Biological Processes | GO:0071824    | protein-DNA complex subunit organiz       | -6.09352 | -3.192262995 |
| High                        | Poor      | Reactome Gene Sets      | R-HSA-69278   | Cell Cycle, Mitotic                       | -6.0812  | -3.192262995 |
| High                        | Poor      | GO Biological Processes | GO:0050657    | nucleic acid transport                    | -5.83526 | -3.022137766 |
| High                        | Poor      | GO Biological Processes | GO:0051640    | organelle localization                    | -5.82829 | -3.022137766 |
| High                        | Poor      | GO Biological Processes | GO:0010564    | regulation of cell cycle process          | -5.80317 | -3.01554104  |
| High                        | Poor      | GO Biological Processes | GO:0022411    | cellular component disassembly            | -5.65267 | -2.924632038 |
| High                        | Poor      | Reactome Gene Sets      | R-HSA-9006925 | Intracellular signaling by second mess    | -5.57385 | -2.871581804 |
| High                        | Poor      | KEGG Pathway            | hsa01522      | Endocrine resistance                      | -5.31032 | -2.672456375 |
| High                        | Poor      | Reactome Gene Sets      | R-HSA-5696399 | Global Genome Nucleotide Excision R       | -5.26521 | -2.636301805 |
| High                        | Poor      | GO Biological Processes | GO:0010256    | endomembrane system organization          | -5.14237 | -2.547540214 |
| High                        | Poor      | GO Biological Processes | GO:0007034    | vacuolar transport                        | -5.07027 | -2.502829784 |
| Low                         | Good      | GO Biological Processes | GO:0031349    | positive regulation of defense respons    | -11.3638 | -7.04471182  |
| Low                         | Good      | GO Biological Processes | GO:0034123    | positive regulation of toll-like receptor | -9.75064 | -5.908659302 |
| Low                         | Good      | GO Biological Processes | GO:0002274    | myeloid leukocyte activation              | -9.05642 | -5.515468777 |
| Low                         | Good      | GO Biological Processes | GO:0001819    | positive regulation of cytokine product   | -8.1197  | -4.72885965  |
| Low                         | Good      | GO Biological Processes | GO:0002697    | regulation of immune effector process     | -7.55319 | -4.322781154 |
| Low                         | Good      | GO Biological Processes | GO:0042110    | T cell activation                         | -7.4357  | -4.262718944 |
| Low                         | Good      | Reactome Gene Sets      | R-HSA-1280218 | Adaptive Immune System                    | -6.88873 | -3.848382261 |
| Low                         | Good      | GO Biological Processes | GO:0034154    | toll-like receptor 7 signaling pathway    | -6.37842 | -3.381533764 |
| Low                         | Good      | GO Biological Processes | GO:0032647    | regulation of interferon-alpha producti   | -6.09954 | -3.227589884 |
| Low                         | Good      | GO Biological Processes | GO:0032103    | positive regulation of response to exte   | -5.71845 | -2.955645623 |
| Low                         | Good      | GO Biological Processes | GO:0019221    | cytokine-mediated signaling pathway       | -5.52913 | -2.812084855 |
| Low                         | Good      | GO Biological Processes | GO:0051345    | positive regulation of hydrolase activit  | -5.32993 | -2.70979488  |
| Low                         | Good      | GO Biological Processes | GO:0009617    | response to bacterium                     | -5.04979 | -2.494112201 |

|     |      |                         |            |                                          |          |              |
|-----|------|-------------------------|------------|------------------------------------------|----------|--------------|
| Low | Good | GO Biological Processes | GO:0002831 | regulation of response to biotic stimuli | -5.00653 | -2.465574516 |
| Low | Good | GO Biological Processes | GO:0032760 | positive regulation of tumor necrosis f  | -4.54908 | -2.146005969 |
| Low | Good | GO Biological Processes | GO:0001909 | leukocyte mediated cytotoxicity          | -4.54083 | -2.146005969 |
| Low | Good | GO Biological Processes | GO:0033632 | regulation of cell-cell adhesion mediat  | -4.52092 | -2.136316396 |
| Low | Good | GO Biological Processes | GO:0072507 | divalent inorganic cation homeostasis    | -4.51208 | -2.134368006 |
| Low | Good | GO Biological Processes | GO:0034341 | response to interferon-gamma             | -4.11805 | -1.836372035 |
| Low | Good | GO Biological Processes | GO:0001821 | histamine secretion                      | -4.05752 | -1.7802587   |

---
